# Supplementary material
Source: publisher site journal article supplement (https://www.spandidos-publications.com/4492/downloadSupplementary)

Figure S1. Cell Counting Kit-8 cytotoxicity curves used to calculate the  $IC_{50}$  of 3-BrPA in MCF-7 cells at 24 and 48 h. 3-BrPA, 3-bromopyruvic acid.

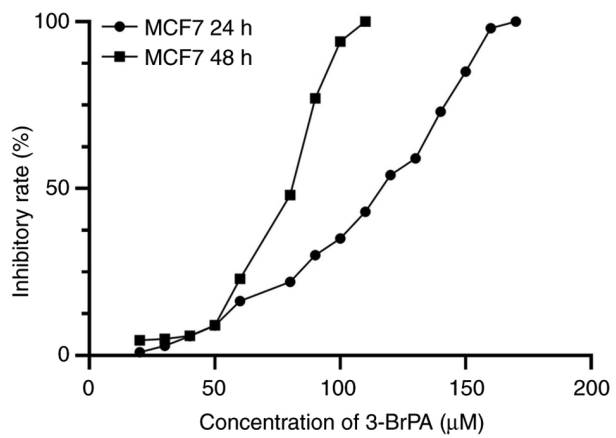

Supplement: Supplementary file 1 [file downloadSupplementary]
